# Supplementary material
Source: PubMed Central journal article supplement (PMC7382987)
Supplement: NIHMS1549618-supplement-1.pdf [file NIHMS1549618-supplement-1.pdf]

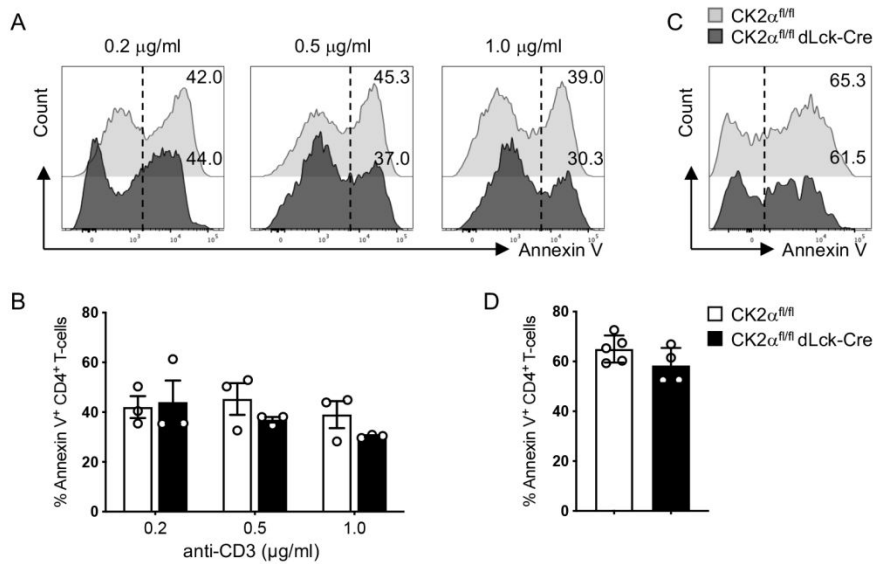

### Supplemental Figure 1. CK2α Expression is not Required for CD4<sup>+</sup> T-cell Survival *In Vitro*

*and In Vivo.* (A) Naïve CD4<sup>+</sup> T-cells were activated with the indicated concentrations of anti-CD3 (0.2 μg/ml, 0.5 μg/ml, 1.0 μg/ml) and 1.0 μg/ml of anti-CD28 Abs for 72 h, and dead and apoptotic cells were assessed by Annexin V staining. Representative line graphs are shown. (B) Percentage of Annexin V<sup>+</sup> CD4<sup>+</sup> T-cells is shown (n = 3). (C) Naïve CD4<sup>+</sup> T-cells from CK2α<sup>fl/fl</sup> or CK2α<sup>fl/fl</sup> dLck-Cre mice were transferred into Rag1<sup>-/-</sup> mice by i.v. injection. Mice were sacrificed 5 days later, and dead and apoptotic CD4<sup>+</sup> T-cells from the spleen were assessed by Annexin V staining. Representative line graphs are shown. (D) Percentage of Annexin V<sup>+</sup> CD4<sup>+</sup> T-cells is shown. CK2α<sup>fl/fl</sup>, n=5; CK2α<sup>fl/fl</sup>dLck-Cre, n=4.

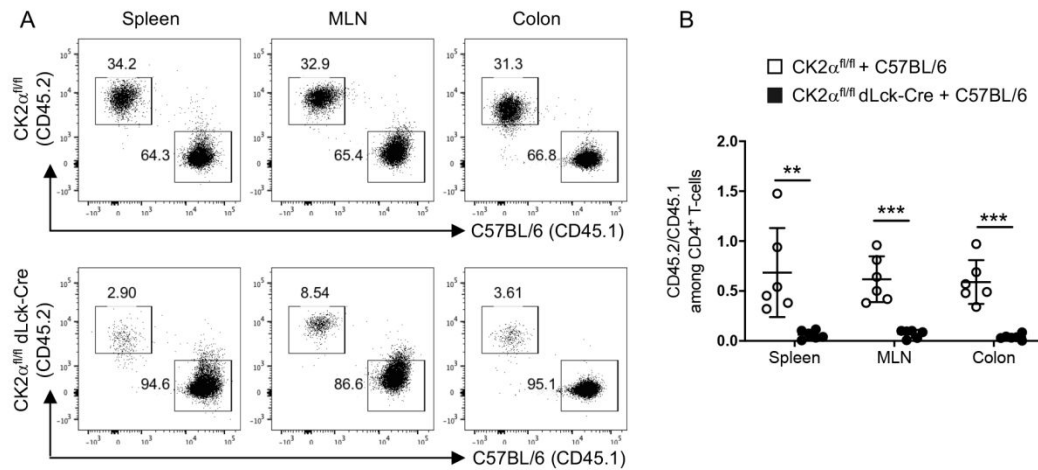

**Supplemental Figure 2. CK2 $\alpha$  Controls T-cell Accumulation in the Spleen and Colon though a Cell-intrinsic Mechanism.** Naïve CD4<sup>+</sup> T-cells from CK2 $\alpha^{fl/fl}$  mice (CD45.2<sup>+</sup>) or CK2 $\alpha^{fl/fl}$  dLck-Cre mice (CD45.2<sup>+</sup>) were co-transferred with naïve CD4<sup>+</sup> T-cells from C57BL/6 mice (CD45.1<sup>+</sup>) at a ratio of 1:1 ( $5 \times 10^5$ :  $5 \times 10^5$ ) into Rag1<sup>-/-</sup> mice by i.v. injection. Recipients were sacrificed at 4 weeks after transfer, and the percentage of C57BL/6 CD4<sup>+</sup> T-cells (CD45.1<sup>+</sup>) and CK2 $\alpha$  intact or deficient CD4<sup>+</sup> T-cells (CD45.2<sup>+</sup>) in the spleen, mesenteric lymph node (MLN) and colon were detected by flow cytometry. **(A)** Representative flow cytometry profile of CD4<sup>+</sup> T-cells recovered from the indicated sites. **(B)** Ratio of CD45.2/CD45.1 CD4<sup>+</sup> T-cells in spleen, MLN and colon. Data represent pooled results from three independent experiments. CK2 $\alpha^{fl/fl}$ , n=8; CK2 $\alpha^{fl/fl}$ dLck-Cre, n=8. Bars represent the mean  $\pm$  SD. \*\*\* p<0.001.

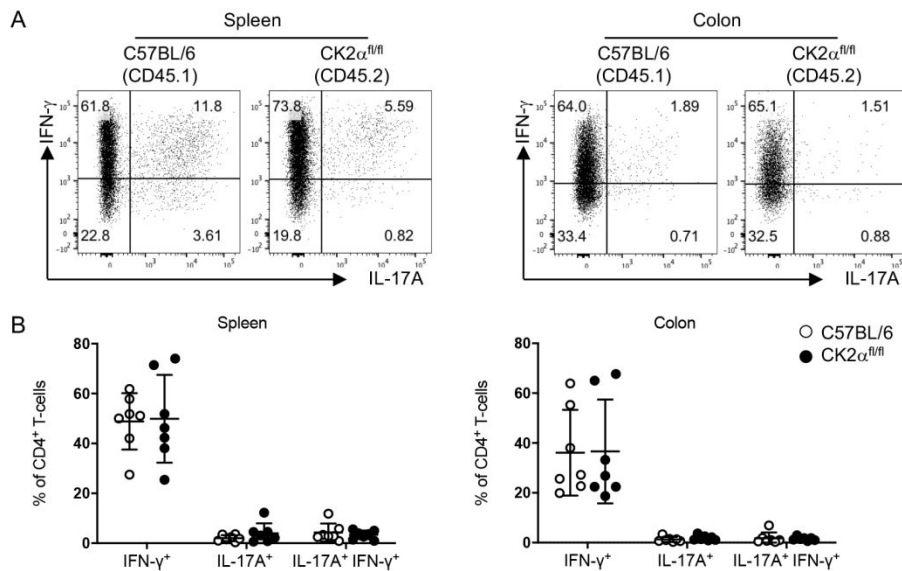

**Supplemental Figure 3. CD4<sup>+</sup> T-cells from CK2α<sup>fl/fl</sup> and C57BL/6 Mice Have Similar Cytokine Profiles.** Naïve CD4<sup>+</sup> T-cells from CK2α<sup>fl/fl</sup> mice (CD45.2<sup>+</sup>) were co-transferred with naïve CD4<sup>+</sup> T-cells from C57BL/6 mice (CD45.1<sup>+</sup>) at a ratio of 1:1 (5 × 10<sup>5</sup>: 5 × 10<sup>5</sup>) into Rag1<sup>-/-</sup> mice by i.v. injections. Recipients were sacrificed 2 weeks after transfer, and cytokine production by C57BL/6 CD4<sup>+</sup> T-cells (CD45.1<sup>+</sup>) or CK2α intact CD4<sup>+</sup> T-cells (CD45.2<sup>+</sup>) in the spleen or colon was detected by flow cytometry. **(A)** Representative flow cytometry profiles of IFN-γ and IL-17A production by CD4<sup>+</sup> T-cells derived from C57BL/6 or CK2α<sup>fl/fl</sup> mice in the spleen or colon. **(B)** Frequencies of IFN-γ<sup>+</sup>, IL-17A<sup>+</sup> and IL-17A<sup>+</sup> IFN-γ<sup>+</sup> CD4<sup>+</sup> T-cells derived from C57BL/6 or CK2α<sup>fl/fl</sup> mice in the spleen or colon are shown.
